# Supplementary material for: Uterine microbiome signatures associated with endometriosis
Source: Research Square preprint supplement (doi:10.21203/rs.3.rs-7016822/v1), 2025-07-14
Supplement: Supplementary file 1 [file 6a82fe449da8547c87424807.xlsx]

## Sheet: Supplementary_Table_S1
Table S1: Selected taxa in proliferative cohort by random forest scoring
Taxa	Importance_score
Staphylococcus sp.1	0.039392
Fenollaria sp.1	0.0295574
Priestia sp.1	0.0285684
Coprococcus sp.1	0.0278263
Butyricimonas sp.1	0.0263634
Corynebacterium sp.2	0.0241719
Staphylococcus sp.2	0.0215524
Finegoldia sp.1	0.0206258
Mobiluncus sp.1	0.019181
Cutibacterium sp.1	0.0189989
Peptoniphilus sp.1	0.0185718
Priestia sp.2	0.0182373
Veillonella sp.1	0.0181003
Prevotella sp.2	0.0178807
Anaerococcus sp.1	0.0176979
Corynebacterium sp.1	0.0175872
Prevotella sp.3	0.016008
Gardnerella sp.1	0.0155083

## Sheet: Supplementary_Table_S2
Table S1: Selected taxa in secretory cohort by random forest scoring
Taxa	Importance_score
Gardnerella sp.1	0.0446154
Lactobacillus sp.1	0.0391035
Ureaplasma sp.2	0.0288268
Lactobacillus sp.2	0.0249357
Lawsonella sp.1	0.0205985
Corynebacterium sp.3	0.0183925
Priestia sp.1	0.018161
Lactobacillus sp.3	0.0171111
Niallia sp.1	0.0168529
Finegoldia sp.1	0.0162363
Dialister sp.1	0.0159219
Lactobacillus sp.4	0.015822
Ureaplasma sp.1	0.0156243

## Sheet: Supplementary_Table_S3
Phase	Sample	Disease_status	Function_dysbiosis_score
proliferative	CEA25J0149	1	-0.238689
proliferative	CEA25J0150	1	3.00394
proliferative	CEA25J0151	1	-0.134064
proliferative	SFBENDO307	1	2.95142
proliferative	SFBENDO308	0	-0.982902
proliferative	SFBENDO313	0	1.69897
proliferative	SFBENDO315	1	2.60489
proliferative	SFBENDO319	1	2.59806
proliferative	SFBENDO322	1	3.0102
proliferative	SFBENDO323	0	0.717935
proliferative	SFBENDO327	0	2.46508
proliferative	SFBENDO328	1	2.64084
proliferative	SFBENDO329	0	0.932851
proliferative	SFBENDO334	1	2.24598
proliferative	SFBENDO336	1	-0.672249
proliferative	SFBENDO337	1	-0.402902
proliferative	SFBENDO339	0	2.85169
proliferative	SFBENDO340	1	0.0193202
proliferative	SFBENDO342	0	2.71789
proliferative	SFBENDO343	0	1.00993
proliferative	SFBENDO349	1	1.25142
proliferative	SFBENDO353	1	2.30103
proliferative	SFBENDO354	0	2.09946
proliferative	SFBENDO358	1	2.48452
proliferative	SFBENDO359	1	0.724887
proliferative	SFBENDO361	0	2.93961
proliferative	SFBENDO362	0	1.47594
proliferative	SFBENDO363	0	-0.00629947
proliferative	X233C241119T25	1	1.03544
proliferative	X233C241119T27	1	0.146288
proliferative	X233C241212T39	1	2.99653
proliferative	X233C241212T40	0	1.1163
proliferative	X233C241212T41	1	2.72035
proliferative	X233C241212T42	1	1.36589
proliferative	X233C241212T43	0	0.543608
proliferative	X233C241212T44	0	2.5384
proliferative	X233C241217T01	1	1.86933
proliferative	X233C241217T02	0	2.46103
proliferative	X233C241217T03	1	3.0205
proliferative	X233C241217T04	1	3.0126
proliferative	X233C241217T05	1	0.880635
proliferative	X233C241217T06	1	2.99728
proliferative	X233C241217T07	0	1.76958
proliferative	X233C241217T08	1	2.50895
proliferative	X233C241217T09	0	3.00059
proliferative	X233C241217T10	0	2.97562
proliferative	X233C241217T11	0	0.947542
proliferative	X233C241217T12	0	1.72433
proliferative	X233C241217T13	1	0.425292
proliferative	X233C241217T14	1	2.55239
proliferative	X233C241217T15	1	2.14131
proliferative	X233C241217T16	1	2.33728
proliferative	X233C241217T17	1	3.01985
proliferative	X233C241217T18	1	0.710838
proliferative	X233C241217T19	1	3.01496
proliferative	X233C241217T20	0	0.050138
proliferative	X233C241217T21	1	2.65092
proliferative	X233C241217T22	1	1.76022
proliferative	X233C241217T23	1	0.796196
proliferative	X233C241217T24	0	-0.780252
proliferative	X233C241217T25	0	0.640268
proliferative	X233C241217T26	0	2.11303
proliferative	X233C241217T27	1	0.892962
proliferative	X233C241217T28	0	1.22338
proliferative	X233C241217T29	0	3.00682
proliferative	X233C241217T30	0	2.4523
proliferative	X233C241217T31	1	1.16804
proliferative	X233C241217T32	0	2.77635
proliferative	X233C241217T33	0	1.76295
proliferative	X233C241217T34	1	2.96569
proliferative	X233C241217T35	1	2.50642
proliferative	X233C241217T36	0	-0.350976
proliferative	X233C241217T37	1	1.73066
proliferative	X233C241217T38	0	0.198781
proliferative	X233C241217T39	0	2.41671
proliferative	X233C241217T40	0	2.14608
proliferative	X233C241217T41	1	1.25913
proliferative	X233C241217T42	0	1.3661
proliferative	X233C241217T43	0	1.40442
proliferative	X233C241217T44	0	2.98891
proliferative	X233C241230T02	1	0.832169
proliferative	X233C241230T03	0	0.616501
proliferative	X233C241230T04	0	2.88172
proliferative	X233C241230T05	0	-0.282398
proliferative	X233C241230T06	1	2.37864
proliferative	X233C241230T07	1	1.5982
proliferative	X233C241230T08	1	2.84173
proliferative	X233C241230T09	1	-0.931976
proliferative	X233C241230T10	0	0.576231
proliferative	X233C241230T11	1	2.14681
proliferative	X233C241230T12	0	-1.11258
proliferative	X233C241230T13	0	-0.410394
proliferative	X233C241230T14	0	0.696068
proliferative	X233C241230T15	1	2.97964
proliferative	X233C241230T16	1	2.01046
proliferative	X233C241230T17	0	0.817228
proliferative	X233C241230T18	0	0.196786
proliferative	X233C241230T19	1	2.84597
proliferative	X233C241230T20	0	1.6165
proliferative	X233C241230T21	0	1.59465
proliferative	X233C241230T22	0	2.64062
proliferative	X233C241230T23	0	3.01907
proliferative	X233C241230T33	1	0.152967
proliferative	X233C241230T38	1	0.705314
proliferative	X233C241230T39	1	2.26491
proliferative	X233C241230T40	1	2.97916
proliferative	X233C241230T41	1	2.4414
proliferative	X233C250106T02	0	0.879233
proliferative	X233C250106T03	1	2.79436
proliferative	X233C250106T04	0	2.83984
proliferative	X233C250106T05	1	1.69356
proliferative	X233C250106T06	1	2.26944
proliferative	X233C250106T07	1	3.01973
proliferative	X233C250106T08	1	3.01012
proliferative	X233C250106T09	1	1.95401
proliferative	X233C250106T10	1	2.25283
proliferative	X233C250106T13	0	1.17574
proliferative	X233C250106T16	1	2.07848
proliferative	X233C250106T18	1	1.19469
proliferative	X233C250106T20	1	2.17331
proliferative	X233C250106T21	0	2.62602
proliferative	X233C250106T22	0	-1.40033
proliferative	X233C250106T23	1	-0.190184
proliferative	X233C250106T24	0	1.53626
proliferative	X233C250106T25	0	2.88564
proliferative	X233C250106T26	1	2.77874
proliferative	X233C250106T27	1	1.30294
proliferative	X233C250106T28	1	2.61744
proliferative	X233C250106T29	1	0.462011
proliferative	X233C250106T30	1	2.54666
proliferative	X233C250106T31	1	1.39224
proliferative	X233C250106T32	1	1.82889
proliferative	X233C250106T33	0	2.88014
proliferative	X233C250106T35	1	2.69762
proliferative	X233C250106T36	0	3.02117
proliferative	X233C250106T38	1	1.34165
proliferative	X233C250106T40	0	2.98431
proliferative	X233C250106T42	1	-0.703374
secretory	CEA25J0148	1	0.578934
secretory	SFBENDO306	0	2.24239
secretory	SFBENDO309	1	1.15427
secretory	SFBENDO316	1	2.2324
secretory	SFBENDO320	0	2.54649
secretory	SFBENDO321	1	2.70039
secretory	SFBENDO324	1	3.01766
secretory	SFBENDO326	0	1.61446
secretory	SFBENDO330	0	1.51036
secretory	SFBENDO331	0	0.0794514
secretory	SFBENDO332	0	0.864398
secretory	SFBENDO333	1	1.03977
secretory	SFBENDO335	1	-1.20565
secretory	SFBENDO338	1	2.7765
secretory	SFBENDO344	0	1.8388
secretory	SFBENDO346	1	2.18468
secretory	SFBENDO348	0	2.08542
secretory	SFBENDO350	1	1.20897
secretory	SFBENDO351	0	1.52785
secretory	SFBENDO355	0	2.9004
secretory	SFBENDO356	0	-0.0271672
secretory	SFBENDO357	0	1.8779
secretory	SFBENDO364	1	-0.119125
secretory	SFBENDO365	1	2.18517
secretory	X233C241119T19	1	2.81135
secretory	X233C241205T02	1	1.27118
secretory	X233C241205T03	1	2.89172
secretory	X233C241205T05	1	1.88517
secretory	X233C241205T06	1	0.630461
secretory	X233C241205T07	1	2.56265
secretory	X233C241205T08	1	0.454944
secretory	X233C241205T09	1	1.37898
secretory	X233C241205T10	1	2.8299
secretory	X233C241205T11	1	2.43456
secretory	X233C241205T12	1	-0.00553905
secretory	X233C241205T13	1	0.962095
secretory	X233C241205T14	1	2.90078
secretory	X233C241205T15	0	-0.160483
secretory	X233C241205T16	1	2.34417
secretory	X233C241205T17	1	2.54219
secretory	X233C241205T18	0	1.69003
secretory	X233C241205T19	0	3.01266
secretory	X233C241205T20	0	1.05832
secretory	X233C241205T21	1	0.114407
secretory	X233C241205T22	0	1.69232
secretory	X233C241205T23	1	-1.25097
secretory	X233C241205T24	1	2.50263
secretory	X233C241205T25	1	1.24667
secretory	X233C241205T27	1	2.79881
secretory	X233C241205T28	0	1.12314
secretory	X233C241205T29	1	2.8315
secretory	X233C241205T30	1	0.618785
secretory	X233C241205T31	1	2.07756
secretory	X233C241205T32	1	1.51507
secretory	X233C241205T33	0	0.984861
secretory	X233C241205T34	0	2.42172
secretory	X233C241205T35	1	2.23551
secretory	X233C241205T36	1	2.59592
secretory	X233C241205T37	0	1.3155
secretory	X233C241205T38	1	2.75158
secretory	X233C241205T39	1	0.733695
secretory	X233C241205T40	1	2.55966
secretory	X233C241205T41	1	1.88898
secretory	X233C241205T42	1	0.756241
secretory	X233C241205T43	0	0.568851
secretory	X233C241205T44	1	2.46331
secretory	X233C241212T01	1	0.365651
secretory	X233C241212T03	0	2.95438
secretory	X233C241212T04	1	0.436801
secretory	X233C241212T05	1	-2.90227
secretory	X233C241212T06	1	2.87644
secretory	X233C241212T07	1	-1.32642
secretory	X233C241212T08	0	2.82672
secretory	X233C241212T09	1	-0.244185
secretory	X233C241212T10	0	2.85753
secretory	X233C241212T11	0	2.42396
secretory	X233C241212T12	1	2.94674
secretory	X233C241212T13	1	-0.346293
secretory	X233C241212T14	1	0.0186222
secretory	X233C241212T15	1	1.12114
secretory	X233C241212T16	1	0.914653
secretory	X233C241212T17	1	1.8359
secretory	X233C241212T18	1	0.402529
secretory	X233C241212T19	1	2.90229
secretory	X233C241212T20	0	0.994284
secretory	X233C241212T21	0	-0.885135
secretory	X233C241212T22	0	2.19237
secretory	X233C241212T23	1	2.78927
secretory	X233C241212T24	1	-0.430991
secretory	X233C241212T25	1	-2.11748
secretory	X233C241212T26	0	-0.019142
secretory	X233C241212T27	0	2.95214
secretory	X233C241212T28	0	2.70822
secretory	X233C241212T29	1	0.983875
secretory	X233C241212T30	1	2.15235
secretory	X233C241212T31	1	2.68927
secretory	X233C241212T32	1	0.241568
secretory	X233C241212T33	1	2.37214
secretory	X233C241212T34	1	0.0555941
secretory	X233C241212T35	1	2.47322
secretory	X233C241212T36	1	1.23384
secretory	X233C241212T37	1	-1.31575
secretory	X233C241212T38	1	0.346343
secretory	X233C241230T24	1	2.39558
secretory	X233C241230T25	1	-0.66681
secretory	X233C241230T26	1	-0.334448
secretory	X233C241230T27	0	2.33924
secretory	X233C241230T28	1	0.866606
secretory	X233C241230T29	1	1.82238
secretory	X233C241230T30	1	2.98123
secretory	X233C241230T31	0	0.589042
secretory	X233C241230T32	0	2.91101
secretory	X233C241230T34	1	2.27375
secretory	X233C241230T35	1	-0.783798
secretory	X233C241230T36	1	1.11223
secretory	X233C241230T37	1	0.60081
secretory	X233C250106T01	1	1.787
secretory	X233C250106T11	0	2.99742
secretory	X233C250106T12	1	0.71657
secretory	X233C250106T14	0	0.416855
secretory	X233C250106T15	0	0.935282
secretory	X233C250106T17	0	2.96023
secretory	X233C250106T19	1	0.82279
secretory	X233C250106T34	1	-1.05077
secretory	X233C250106T37	1	3.00952
secretory	X233C250106T39	1	2.52431
secretory	X233C250106T41	0	-0.156725
secretory	X233C250106T44	1	2.55629

## Sheet: Supplementary_Table_S4
S4: Feature set of proliferative cohort
Fenollaria sp.1	Anaeroglobus sp.1	Anaerococcus sp.1	Coprococcus sp.1	Prevotella sp.1	Varibaculum sp.1	Corynebacterium sp.1	Thalassobacillus sp.1	Staphylococcus sp.1	Priestia sp.1	Butyricimonas sp.1	Corynebacterium sp.2	Staphylococcus sp.2	Finegoldia sp.1	Mobiluncus sp.1	Cutibacterium sp.1	Peptoniphilus sp.1	Priestia sp.2	Veillonella sp.1	Prevotella sp.2	Prevotella sp.3	Gardnerella sp.1	sample	group	dysbiosis_score
0	0	0	0	0	0	0	0	0	0.00208368	0	0	0	0	0	0	0	0	0	0	0	0	CEA25J0149	1	-0.238689
0	0	0	0	0	0	0	0	0	0.0817661	0	0	0	0	0	0	0	0.122649	0	0	0	16.8438	CEA25J0150	1	3.00394
0	0	0	0	0	0	0	0	0.0965795	0.00804829	0	0	0	0	0	0	0	0.00402414	0	0	0	0	CEA25J0151	1	-0.134064
0	0	0	0	0	0	0	0	2.21138	0.0325203	0	2.27642	0	0	0	0	0	0.0325203	0	0	17.6585	0	SFBENDO307	1	2.95142
0	0	0	0	0	0	0	0	0	0	0	0	0	0	0	0	0	0.00187415	0	0	0	0	SFBENDO308	0	-0.982902
0	0	0	0	0	0	0	0	0.947867	0.473934	0	0	0	0	0	0	0	2.36967	0	0	0	0	SFBENDO313	0	1.69897
0	0	0	0	0	0	0	0	0	0	0.0106384	0	0	0	0	0	0	0	30.8148	0	0.228135	0	SFBENDO315	1	2.60489
0	0	0	0.0586854	8.27465	0	0	0	0	1.81925	0	0	0	0	0	0	0	0.0586854	7.15962	0	0.176056	0.117371	SFBENDO319	1	2.59806
0.13689	0	0.019101	0	0	0.101872	0	0	0.012734	0	0.0031835	0	0	0.544378	0.108239	0	0.197377	0	0.658984	0.0986884	1.70317	0	SFBENDO322	1	3.0102
0	0	0	0	0	0	0	0	0	0	0	0.00235863	0	0	0	0	0	0	0	0	0.0518899	0	SFBENDO323	0	0.717935
0	0	0	0	0	0	0	0	0.00796305	0.00796305	0	0.394171	0	3.31263	0	0	0.672878	0	19.3303	2.32123	0.0875936	0.00398153	SFBENDO327	0	2.46508
1.77125	3.27869	0	0	4.52233	1.43207	0	0.018843	0.0376861	0.0376861	0	0.18843	0	4.4658	2.07273	0	0	0	7.85755	8.02713	0	0.18843	SFBENDO328	1	2.64084
0	0	0	0	0	0	0	0	0.0756716	0	0	0.0614832	0	0	0.0425653	0	0	0	0.960083	0	0	0.435112	SFBENDO329	0	0.932851
0	0	0.0590867	0.0168819	0	0	0	0	0	0	0	0	0	0	0	0	0.270111	0	0	0	0.00844096	14.9743	SFBENDO334	1	2.24598
0	0	0	0	0	0	0	0	0	0	0.0336715	0	0	0	0	0	0	0	0	0	0.00336716	0.00336716	SFBENDO336	1	-0.672249
0	0	0	0	0	0	0	0	0	0	0.0210057	0	0	0.00273988	0	0	0	0	0	0	0.0228323	0	SFBENDO337	1	-0.402902
0.224805	0	0	0.0042416	0	5.95097	0	0	0	0	0	0	0	5.97218	3.07516	0	3.52901	0	4.03376	47.7223	0	0	SFBENDO339	0	2.85169
0	0	0	0	0	0	0	0	0.383081	0.0159617	0	0	0	0.0159617	0	0	0	0.0159617	0	0	0	0	SFBENDO340	1	0.0193202
0	0	0	0.00440102	0	0.607341	0	0	0.158437	0	0	0	0.00880204	4.84552	0.911011	0	3.78928	0.00440102	0.629346	9.4798	11.8475	0.426899	SFBENDO342	0	2.71789
0	0	0	0	0	0.01353	0	0	0.0811798	0	0	0	0	0.0865918	0.0324719	0	0.0378839	0	0	0.10824	0	0	SFBENDO343	0	1.00993
0	0	0	0.0112032	0	0	0	0	0	0.0112032	0	0	0	0	0	0	0	0	0	0	0	1.59086	SFBENDO349	1	1.25142
2.59649	0	5.96491	0	0	0.280702	0	0	0.561404	0.210526	0	0	0	0.701754	0	0	5.26316	0.140351	0	0	0	0	SFBENDO353	1	2.30103
0	0	0	0	0	0	0	0	1.41674	0	0	0	0.5449	0	0	0.010898	0.010898	0	2.52833	0	0	0	SFBENDO354	0	2.09946
1.14102	0.592797	0	0	3.15564	1.97005	0	0	0	0	0	0	0	0.953824	0.249599	0	0.570512	0	0	0.802282	0	0	SFBENDO358	1	2.48452
0	0	0	0	0	0	0	0	0.11713	0.0292826	0	0	0	0	0	0	0	0	0	0	0	0	SFBENDO359	1	0.724887
0	0	0	0	0	0	0	0	0.116709	0.0194515	0.0778059	0	0	0	0	0	0	0.0194515	0	0	45.4581	36.8411	SFBENDO361	0	2.93961
0	0	0	0	0	0	0	0.017334	1.69873	0.0346681	0.017334	0	0.676027	4.95753	0	0	0.918703	0.017334	0	0	0	0	SFBENDO362	0	1.47594
0	0	0	0	0	0	0	0	0	0	0	0	0	0.00590179	0	0	0	0	0	0	0	0	SFBENDO363	0	-0.00629947
0	0	0	0	0	0	0	0	0.0729838	0.012164	0	1.39886	0	2.99234	0	0	0	0	0	0	0	0	X233C241119T25	1	1.03544
0	0	0	0	0	0	0	0	0.386349	0	0	0	0	0.0321958	0	0	0	0	0	0	0	0	X233C241119T27	1	0.146288
0	0	0	0	0	0	0	0	0	0.00419129	0	0	0	0.0712519	0	0	0	0.00419129	0	0.521816	37.139	0	X233C241212T39	1	2.99653
0	0	0	0	0	0	0	0	0	0	0	0	0	0	0	0	0	0	0	0.355659	0	0.376099	X233C241212T40	0	1.1163
0	0	0	0	0	0	0	0	0	0	0	0	0	0	0	0	0	0	0	0	49.091	0	X233C241212T41	1	2.72035
0	0	0	0	0	0	0	0	0	0	0	0	0	0	0	0	0	0.00284455	4.50576	0	0	1.96558	X233C241212T42	1	1.36589
0	0	0	0	0	0	0	0	0.0238046	0	0	0	0	0	0	0	0	0	0	0	0	0	X233C241212T43	0	0.543608
0	0	0	0	0	0	0	0.0403714	0	0.0403714	0	0	0.0201857	0	0.1413	0.302786	0.0605571	0.0201857	0	0.363343	1.00929	25.2523	X233C241212T44	0	2.5384
0	0	0	0.0160111	1.916	0	0	0	0	0	0.0160111	0	0	0	3.14885	0	0.314885	0	0	0	0	1.65982	X233C241217T01	1	1.86933
0	0	0	0	0	0	0	0	0	0	0	0	0	5.23599	0	0	24.0413	0	0	0	0	0	X233C241217T02	0	2.46103
0	0	0	0.00231374	0	0	0	0	0	0	0	0	0	0	0.717261	0	0.12957	0	0	0.291532	0	19.4921	X233C241217T03	1	3.0205
0.135668	0.119707	0	0	0	0.338372	0	0	0.00638437	0	0	0	0.00159609	0.359121	0	0	0.64961	0	0	3.95033	7.78414	60.6978	X233C241217T04	1	3.0126
0	0	0	0	0	0	0	0	0	0	0	0	0	0	0	0	0	0	0	0	0.683952	0.00125496	X233C241217T05	1	0.880635
0.0619666	0	0	0	0	0	0	0	0	0	0.0097842	0	0	0	5.13345	0	0.494646	0	0	0.54248	0	23.6191	X233C241217T06	1	2.99728
0	0	0	0	0	0	0	0	0	0.0114129	0.0342388	0	0	0	0	0	0	0	0	0	0	0.0228258	X233C241217T07	0	1.76958
0	0	0	0.00253004	0	0	0	0	0.0016867	0	0.00253004	0	0	0.00674678	0	0	0	0	0	0	13.276	0	X233C241217T08	1	2.50895
0	0	0	0	0	0	0	0	0	0	0	0	0	0	0	0	0	0	0	0	0	95.0204	X233C241217T09	0	3.00059
0.186892	0	0	0	2.00425	0	0	0	0	0	0	0	0	0	0	0	0.199781	0.0257782	1.93336	0.238448	0	64.5614	X233C241217T10	0	2.97562
0	0	0	0	0	0	0	0	0.0170263	0	0.00425659	0	0.00425659	4.79292	0	0	0	0	0	0	0	0.429915	X233C241217T11	0	0.947542
0	0	0	0	0	0	0	0	0	35.1903	0	0	0	0	0	0	0	0.606729	0	0	0	0.220629	X233C241217T12	0	1.72433
0	0	0	0	0	0	0	0	0	0.00830737	0	0	0	0	0	0	0.00415369	0.0290758	0	0	0.0290758	0.103842	X233C241217T13	1	0.425292
0	0	0	0	4.82074	0	0	0	0	0	0.0121124	0	0	4.13033	0	0	3.80935	0	1.62306	8.49685	5.31734	1.1749	X233C241217T14	1	2.55239
1.12015	2.41779	0.0071958	0	0.189489	1.08177	0	0	0.709985	0.0023986	0	0	0	1.13933	0.199084	0	0.674006	0	2.09638	0.131923	8.02331	0.0047972	X233C241217T15	1	2.14131
0	0	0.0466962	0	0	1.25379	0	0	6.23395	0	0	4.88209	0.0653747	7.07448	0.382909	0	1.87952	0.00233481	0	2.36516	4.6883	0	X233C241217T16	1	2.33728
0	0	0	0	0	0	0	0	0	0	0.00342024	0	0	0.0359125	0	0	0.106882	0	0	0.973057	12.9251	0.0256518	X233C241217T17	1	3.01985
0	0	0	0	0	0	0	0	0.00373507	0	0	0	0	0.0112052	0	0	0	0	0.00186754	0.00373507	0.149403	0	X233C241217T18	1	0.710838
0.212711	0	0	0	0	0.144798	0	0	0.0153767	0	0	0.00640697	0	0.46899	0.393388	0	0.320349	0	0	3.69554	5.2896	0	X233C241217T19	1	3.01496
0	0	0	0.0055701	0	0	0	0	0	0	0.0148536	0	0	0	0	0	0	0.0018567	0	0.0018567	0	0.0724113	X233C241217T20	0	0.050138
8.81648	0	0	0.0479157	37.7575	0	0	0	0	0.33541	0.431241	0	0	0	0	0	0	0.191663	0	0	0	0.191663	X233C241217T21	1	2.65092
0	0	0	0	0	0	0	0	0	0	0	0	0	2.23433	0	0	0.152053	0	0	0.375908	2.77496	0	X233C241217T22	1	1.76022
0.205284	0	0	0.0198662	0.211906	0.0132442	0	0	0	0	0.0198662	0	0	0	0.00662208	0	0	0.0198662	0	0	0.0397325	0.0927091	X233C241217T23	1	0.796196
0	0	0	0	0	0	0	0	0	0	0.0037696	0	0	0	0	0	0	0	0	0	0	0.00125653	X233C241217T24	0	-0.780252
0	0	0	0	0	0	0	0	0	0	0	0	0	0.0107342	0	0	0	0	0	0	0.0126859	0	X233C241217T25	0	0.640268
0	0	0	0	0	0	0	0	0	0	0.00716236	0	0	0	0	0	0	0	0	0	0	0.00984825	X233C241217T26	0	2.11303
0	0	0	0.0104069	0	0	0	0	0	0	0.0208138	0	0	0.0156104	0.00520346	0	0.0312207	0	0	0.0260173	0.0936622	0.291393	X233C241217T27	1	0.892962
0	0	0	0	0	0	0	0	0	0	0	0	0	0	0	0	0	0	0.108609	0	0	1.52408	X233C241217T28	0	1.22338
0	0	0	0	0	0	0	0	0	0	0	0	0	0	0	0	0	0	0	0	0.0194129	88.1657	X233C241217T29	0	3.00682
0	0	0	0	0	0	0	0	0	0	0.112613	0	0	0	0	0	0	0.0281532	0	0	0	7.77027	X233C241217T30	0	2.4523
0	0	0	0.0332005	0	0	0	0	0.298805	0.0166003	0.0166003	0	0	0	0	0	0	0	0	0	0	0.348606	X233C241217T31	1	1.16804
0	0	0	0	0	0.675775	0	0	0.205671	0	0	0	0	7.18378	0	0	0	0	12.4431	38.2547	0	0.0293815	X233C241217T32	0	2.77635
0	0	0	0	0	0	0	0	0	0	0.13624	0	0	0	0	0	0.0681199	0	0	0.0681199	0	0	X233C241217T33	0	1.76295
0	0	0	0	0	0	0.00306736	0	0	0	0	0	0	0	0	0	0.0439655	0	0.152346	0	13.2786	64.9339	X233C241217T34	1	2.96569
0	0	0.117233	0	0	0	0	0	0.198395	0	0.0135269	0	0	0.135269	0	0	0.951393	0	1.14528	0	5.67229	0.0811615	X233C241217T35	1	2.50642
0	0	0	0	0	0	0	0	0	0	0	0	0	0.049928	0	0	0	0	0	0	0	0.00881083	X233C241217T36	0	-0.350976
0	0	0	0	0	0	0	0	27.4022	0	0	17.1555	17.3578	0.186727	0	0	0.186727	0	0	0.116704	1.47825	0.00778028	X233C241217T37	1	1.73066
0	0	0	0	0	0	0	0	0	0	0.00433792	0	0	0.0325344	0	0	0	0	0.00867585	0.00361494	0.109171	0	X233C241217T38	0	0.198781
0	0	0	0	0	0	0	0	0	0	0	0	0	0.23273	0	0	0	0	0	0	0	24.7435	X233C241217T39	0	2.41671
0	0	0	0	0	0	0	0	0.0241955	0	0.0120978	0	0	0.861965	0	0	0.105855	0.00604888	1.45173	0	12.0705	0.00604888	X233C241217T40	0	2.14608
0	0	0	0	0	0	0	0	0	0.0425804	0	0	0	0	0	0	0	0.0212902	0	0	0	0.0425804	X233C241217T41	1	1.25913
0	0	0	0	0	0	0	0	0	0	0	0	0	0	0	0	2.19457	0.00950029	0	0	0	0.00950029	X233C241217T42	0	1.3661
0	0	0	0	0	0	0	0	0	0	0.0527287	0	0.0131822	0	0	0	0	0	0	0	1.99051	0.0659109	X233C241217T43	0	1.40442
0	0	0.0290373	0.00107545	0	0.244128	0	0	0.00645272	0	0	0	0	3.26938	0.00860363	0	2.41117	0	0.0107545	7.50559	2.93922	67.7235	X233C241217T44	0	2.98891
0	0	0	0	0	0	0	0	0	1.18168	0	0	0.14771	0	0	0	0	4.43131	0	0	0	0.0738552	X233C241230T02	1	0.832169
0	0	0	0	0	0	0	0	0.728218	0.0390117	0.0130039	0	0.624187	0	0	0	0	0	0	0	0	0	X233C241230T03	0	0.616501
0	0	0	0	0	0.0135002	0	0	0.0441826	0	0	0.0785469	0.033137	2.46564	0	0	2.527	0	0.020864	2.08272	36.015	0	X233C241230T04	0	2.88172
0	0	0	0	0	0	0	0	0.0217131	0	0.00643351	0.0329717	0.0176921	0.125453	0	0	0.000804188	0	0	0	0	0	X233C241230T05	0	-0.282398
0	0.0831562	0	0	0	0	0	0	0.563615	0	0	0	0.45274	0.0277187	0	0	0.572854	0.00923958	0	2.28218	7.73353	7.4933	X233C241230T06	1	2.37864
0	0	0	0	0	0.143783	0	0	11.1637	0.00256756	0	0	7.52808	0.0847294	0	0	0.0731754	0	0	0.833173	0	0	X233C241230T07	1	1.5982
0	0	0	0	0	0	0	0	10.0091	0.0608458	0	0	8.12291	0	0	0	0	0.0608458	0	0	0	53.6355	X233C241230T08	1	2.84173
0	0	0	0	0	0	0	0	0	0	0	0	0	0.00537731	0	0	0	0	0	0	0.0098584	0	X233C241230T09	1	-0.931976
0	0	0	0	0	0	0	0	0.549043	0	0.00675052	0.787561	0.481537	0	0	0	0	0.00450035	0	0	0	0	X233C241230T10	0	0.576231
0	0	0	0	0	0	0	0.00690036	0.76594	0	0	0.103505	0.552029	3.9263	0	0	1.40077	0.0138007	0	0	7.6318	0	X233C241230T11	1	2.14681
0	0	0	0	0	0	0	0	0	0	0	0	0.00350748	0	0	0	0	0	0	0	0	0.00701496	X233C241230T12	0	-1.11258
0	0	0	0	0	0	0	0	0	0.0424028	0.0141343	0	0	0	0	0.0141343	0	0.0424028	0.636042	0	0	0	X233C241230T13	0	-0.410394
0	0	0	0	0	0	0	0.0554939	0	0.388457	0	0	0	0	0	0.110988	0	0.887902	0	0	0	0.0554939	X233C241230T14	0	0.696068
0	0	0	0	0	0.16	0	0	0.24	0.16	0	2.48	0.24	0	0	0	0	0	0	0	0	80.08	X233C241230T15	1	2.97964
0	0	0.0555864	0	0	0	0.0416898	0	4.44691	0.00694831	0.0138966	2.04975	3.22401	0.785158	1.21595	0	1.26459	0	0	1.34102	4.33574	0	X233C241230T16	1	2.01046
0	0	0	0	0	0	0	0	0.00922777	0	0.00131825	0	0	0.015819	0	0	0	0	1.00583	0	0	0	X233C241230T17	0	0.817228
0	0	0	0	0	0	0	0	0	0.0311526	0	0	0	0	0	0.0311526	0	0	0	0	0.0311526	0.0311526	X233C241230T18	0	0.196786
5.54786	0	0	0	4.10591	0.472505	0	0	1.24644	0	0.0244399	0.513238	1.04277	10.778	0	0	5.89817	0.00814664	0	7.31568	2.89206	1.14053	X233C241230T19	1	2.84597
0	0	0	0	0	0	0	0	0.204941	0	0	0	0.148013	0.227713	0	0	0.341569	0.0113856	0	0	2.39098	0.569282	X233C241230T20	0	1.6165
0	0	0	0	0	0	0	0	0.139567	9.07188	0.139567	0	0	0	0	0	3.14027	0.139567	0	0	0	0	X233C241230T21	0	1.59465
0	0	0.0230814	0	0	0	0	0	0.219273	0	0.0115407	1.43104	0.16157	2.08886	0	0.0115407	2.07732	0	0.0230814	0	15.453	0	X233C241230T22	0	2.64062
0	0	0	0	0.0675333	0	0	0	0	0	0	0	0.00738646	0	0.0422083	0	0	0	0.0179385	0	0.220539	99.026	X233C241230T23	0	3.01907
0	0	0	0	0	0	0	0	0	0	0	0	0	0	0	0	0.00181059	0	0	0.00995827	0.0742343	0.0271589	X233C241230T33	1	0.152967
2.05395	0	0	0.015328	0	0	0	0	0	0.015328	0	0	0	0	0	0	0.015328	0	0	0.275904	0	0.0459841	X233C241230T38	1	0.705314
0	0	0.160792	0	0	0	0	0	0.259412	0	0	1.38496	0.207958	6.78758	0	0	1.53289	0	0.578853	0.636738	3.08293	0.656033	X233C241230T39	1	2.26491
0	0	0	0	0	0.839764	0.0226963	0	0	0.0226963	0.0226963	4.67544	0	0	0	0	0	0	0	0.408534	0	85.429	X233C241230T40	1	2.97916
1.20846	0.302115	0	0	0	1.20846	0	0	0	0	0.060423	0	0	0.60423	0	0	0	0.060423	0	4.77341	4.83384	6.34441	X233C241230T41	1	2.4414
0	0	0	0	0	0	0	0	0.0351746	0	0.00351746	0	0	0	0	0	0	0	0	0	0	0.697161	X233C250106T02	0	0.879233
0	0	2.8251	0	0	1.00134	0	0	13.7143	0.00534045	0	3.73565	2.17623	19.4393	0.656876	0	1.89319	0	1.38852	12.5527	0	0.00267023	X233C250106T03	1	2.79436
0	0	0	0	0	0.364991	0.00744879	0	0.0223464	0	0	0.18622	0	16.041	0	0	5.59032	0	0	3.93669	0.0037244	0.0260708	X233C250106T04	0	2.83984
0	2.01701	0	0	0	0.0293265	0	0	0	0	0	0	0	0.319333	0	0	0.296523	0	0	0.345401	2.76321	0	X233C250106T05	1	1.69356
0	0	2.15232	0.0827815	0	0	0	0	0.331126	0	0	0.993377	0	2.81457	0	0	6.12583	0	0	0	0	0.0827815	X233C250106T06	1	2.26944
0	0	0	0	0	0	0	0	0.0290107	0	0	0	0	0.0435161	0	0.123296	0.253844	0	0	2.39339	1.61735	91.935	X233C250106T07	1	3.01973
0	0	0	0	0	0	0	0	0	0.0020247	0	0	0	0	0	0	0	0	0	0	9.09496	64.5191	X233C250106T08	1	3.01012
0	0	0	0	0	0	0	0	0.0748503	0.112275	0	0	0	0	0	0	0	0	0	0	0	8.23353	X233C250106T09	1	1.95401
1.08326	0.301764	0	0	3.24203	0.0696379	0	0	0.0103167	0.00257918	0.0180543	0.0747962	0.00257918	0.843392	0.510678	0	0.704116	0	0	0.381719	6.49438	1.5862	X233C250106T10	1	2.25283
0	0	0	0	0	0	0	0	0.286016	0	0	0	0	0	0	0	0	0	0	0	1.0508	0.230057	X233C250106T13	0	1.17574
0.113489	0	0.15905	0	0	0.726493	0.152423	0	2.08587	0.00248515	0	2.83224	0.0049703	0.820928	0	0	3.02691	0.000828384	0	3.77246	0	0	X233C250106T16	1	2.07848
0	0	0	0	0.515963	1.06417	0	0	0	0	0	0.0322477	0	0.128991	0	0	0.0322477	0	0	0	0.741696	0.0322477	X233C250106T18	1	1.19469
0	0	0	0	0	0.407	0	0	1.3024	0	0	0	0	0	0	0	0.2035	0	0	1.221	0	0	X233C250106T20	1	2.17331
0	0	0	0	0.761421	0	0	0	0.0780945	0	0.0390472	0.507614	0	2.18665	0	0	0.859039	0	0.0195236	0	1.54237	8.43421	X233C250106T21	0	2.62602
0	0	0	0	0	0	0	0	0	0	0.00512487	0	0	0	0	0	0	0	0	0	0	0	X233C250106T22	0	-1.40033
0	0	0	0	0	0	0	0	0.0776398	0	0	0	0	0.00970497	0	0	0	0	0	0	0	0	X233C250106T23	1	-0.190184
0	0	0	0	0	0	0	0	0.136867	0	0	0.0266129	0	0.437212	0	0	0.0152074	0	0	0.0342166	2.2545	0.0456222	X233C250106T24	0	1.53626
0	0	0	0	0.00727855	0	0	0	0.45127	0	0.0145571	0.443992	0.0145571	6.01936	0.0436713	0	2.45287	0	0	2.65667	10.1609	8.13014	X233C250106T25	0	2.88564
0	0	0	0	0	0	0.474558	0	0.537649	0	0	0.110639	0	0	0	0	0	0	0	0	0.907054	11.5256	X233C250106T26	1	2.77874
0	0	0	0	0	0	0	0	0.0103788	0	0	0	0	0	0	0	0	0	0	0	0	1.9097	X233C250106T27	1	1.30294
0	0	0	0	0	0	0	0	0	0	0	0	0	0	0	0	0	0	0	0	0	0.738843	X233C250106T28	1	2.61744
0	0	0	0	0	0	0	0	0	0	0	0	0	0	0	0	0	0	0	0.000454604	0	0.241092	X233C250106T29	1	0.462011
0	0	0	0	0	0	0	0	0	36.9541	0	0	0	0	0	0	0	0.76574	0	0	0	31.4237	X233C250106T30	1	2.54666
0	0	0.0518239	0	0	0	0	0	0	0	0	1.06095	0	0.202977	1.75769	0	0	0.00431866	0	0.169867	0	0.0460657	X233C250106T31	1	1.39224
0	0	0	0.0641026	0	0	0	0	0.384615	0	0	0	0	0	0	0	0	0	0	0	0	0.320513	X233C250106T32	1	1.82889
0	0	0	0	0	0	0	0	0	0.00072091	0	0	0	0	0	0	0	0	0	0	0	55.2253	X233C250106T33	0	2.88014
0	0	0	0	4.53552	0.910747	0.163934	0	1.20219	0.892532	0	7.70492	0.0182149	3.22404	2.6776	0	5.93807	0.0364299	3.22404	12.623	10.3643	0.0182149	X233C250106T35	1	2.69762
0	0	0	0	0	0	0	0	0	0	0.00455957	0	0	0	0	0	0	0	0	0	21.964	39.3446	X233C250106T36	0	3.02117
0	0	0	0	0	0	0	0	0	10.3066	0	0	0	0	0	0	0	0.369979	0	0	0	0	X233C250106T38	1	1.34165
0	0	0	0	0	0	0	0.0995025	0.0995025	0.0497512	0	0	0	0	0	0	0.149254	0	0	0	1.19403	0	X233C250106T40	0	2.98431
0	0	0	0	0	0	0.0211068	0	0	0	0	0.000844274	0	0.0270168	0	0	0	0	0	0	0	0	X233C250106T42	1	-0.703374

## Sheet: Supplementary_Table_S5
S5: Feature set of secretory cohort
Ureaplasma sp.1	Niallia sp.1	Murdochiella sp.1	Gardnerella sp.1	Lactobacillus sp.1	Lactobacillus sp.2	Lawsonella sp.1	Corynebacterium sp.3	Priestia sp.1	Lactobacillus sp.3	Finegoldia sp.1	Dialister sp.1	Lactobacillus sp.4	Ureaplasma sp.2	sample	group	dysbiosis_score
0	0	0	0	0	0	0	0	0	99.1791	0	0	0	0	CEA25J0148	1	0.578934
0	0	0	0	22.2778	54.7408	0	0	0.00549662	0	3.79267	0	0	0	SFBENDO306	0	2.24239
0	0	0	0	3.98977	5.73226	0	0	0	78.8964	0.131379	0	0	0	SFBENDO309	1	1.15427
0	0	0	0	47.4264	0.0439174	0.228371	0	0.00878349	2.41985	5.23057	0.0658762	0.0966184	0.0263505	SFBENDO316	1	2.2324
0	0	1.57188	0.0176616	28.7708	0.10597	0.582833	0	0.0176616	4.07983	7.55917	0.0353232	0	0	SFBENDO320	0	2.54649
0	0	0	0	0	0.00103289	0	0	0	51.3417	0.325359	0	0	0	SFBENDO321	1	2.70039
0.00803988	0	0	96.8028	0.0696789	0.00803988	0	0	0	0	0.426114	0	0	0.351075	SFBENDO324	1	3.01766
0	0	0	0	0.0899388	0.00599592	0	0	0.0119918	94.5737	0.935364	0	0	0	SFBENDO326	0	1.61446
0	0	0	3.07321	96.7146	0.00266887	0	0.00133444	0	0	0	0	0	0	SFBENDO330	0	1.51036
0	0	0	0	0.0539195	0	0	0	0	97.5156	0	0	1.02447	0	SFBENDO331	0	0.0794514
0	0	0.0592259	0	0.145103	0	0	0	0	98.7089	0.128816	0	0.161391	0	SFBENDO332	0	0.864398
0	0	0	0.0574713	27.1839	71.3362	0.0311303	0	0.00239464	0.0598659	0	0	0	0	SFBENDO333	1	1.03977
0	0	0	0	1.01241	18.834	0	0.00936549	0	80.104	0.0159213	0	0	0	SFBENDO335	1	-1.20565
0	0	0	0	0.0637349	0.0318674	1.24283	0.764818	0.0637349	0.0637349	12.0459	0.637349	0	0	SFBENDO338	1	2.7765
0	0	0	0	0.0283688	2.80851	0	0	0	90.2411	0	0	0	0	SFBENDO344	0	1.8388
0	0	0	0	65.8883	0.203046	0	0	2.03046	0	9.94924	0	0	0	SFBENDO346	1	2.18468
0	0	0	3.56885	14.4196	0	13.0858	0	0.144196	0	0	0	0	0	SFBENDO348	0	2.08542
0	0	0	0	71.8163	0	0	0	3.13152	0	0	0	0	0	SFBENDO350	1	1.20897
0	0	0	0	20.9983	73.7809	0.0164006	0	0	0	1.57993	0.0328012	0	0	SFBENDO351	0	1.52785
0	0	0	12.1902	0.0252908	0.0252908	0.151745	0.88518	0	0	11.9879	1.34041	0	0	SFBENDO355	0	2.9004
0	0	0	0	98.4115	0	0	0	0	0.0152742	0	0	0	0	SFBENDO356	0	-0.0271672
0	0	0	0	0.0682687	0.0682687	0	0	0.0136537	71.2179	0.273075	0	0	0	SFBENDO357	0	1.8779
0	0	0	0	0	0	0.0122008	0	0	99.8463	0	0	0	0.0512433	SFBENDO364	1	-0.119125
0	0	0	0	0	0	1.22172	25.8824	0	0	1.53846	0	0	0	SFBENDO365	1	2.18517
0	0	0	0	0	0	0	0	0	37.6111	0.451955	0.0465248	0	0	X233C241119T19	1	2.81135
0	0	0	0	69.897	0	0.0278474	0	2.53411	0	0	0	0	0	X233C241205T02	1	1.27118
0	0	0	58.0892	0	0	0	0	2.59163	0.00967024	0	0	0	0	X233C241205T03	1	2.89172
0	0	0	0	72.782	0	0	0.018797	0	0	6.16541	0	0	0	X233C241205T05	1	1.88517
0	0	0	0	82.1749	0.153886	0	0	0.0512952	10.336	0	0	1.35932	0.128238	X233C241205T06	1	0.630461
0	0	0	0	60.322	0	0	0	0.0167701	0	0.134161	0	0	0	X233C241205T07	1	2.56265
0	0	0	0.0206569	0.0619707	0	0	0	0.0206569	95.0217	0.433795	0	0.454452	0	X233C241205T08	1	0.454944
0	0	0	0	31.4824	0.201005	0.0376884	0	0.0502513	21.9598	0	0	0	0.0502513	X233C241205T09	1	1.37898
0	0	0	51.17	0	22.7116	0	0	0.0344116	0.0344116	0	0	0	0	X233C241205T10	1	2.8299
0	0	0	0	3.95618	0	0.802935	0.0691269	0.0159524	0	5.81197	0.0319047	0	0	X233C241205T11	1	2.43456
0	0	0	0	77.5911	0	0	0	0.00982415	0.00982415	0	0	0	0	X233C241205T12	1	-0.00553905
0	0	0	0.6451	5.89128	33.327	0	0	0	58.391	0	0	0	0	X233C241205T13	1	0.962095
0	0	0	68.1626	0	0	0	0	0	0	0.165658	0.0863428	0	0	X233C241205T14	1	2.90078
0	0	0	0	99.7987	0	0.0070373	0	0	0	0.0394089	0	0	0	X233C241205T15	0	-0.160483
0	0	0	0	72.1853	0.00608902	0	0	0	0	0	1.6075	0	0	X233C241205T16	1	2.34417
0	0	0	0	13.4244	7.39493	1.36549	0.372406	2.96152	0.0354673	16.1553	0.248271	0	0.124135	X233C241205T17	1	2.54219
0	0	0	0.0424268	0	4.49724	0	0	11.1158	0.0848536	0	0	0	0	X233C241205T18	0	1.69003
0	0	0	88.438	0.0255232	0	0	0.0255232	0.0510465	0	0.816743	1.63349	0	0	X233C241205T19	0	3.01266
0	0	0	0	74.1394	0.0134201	0	0	0.00671006	21.0897	0.0134201	0	0	0	X233C241205T20	0	1.05832
0	0	0	0	99.8679	0	0	0	0	0	0.00718205	0	0	0	X233C241205T21	1	0.114407
0	0	0	0	2.65871	2.44167	0	2.65871	0.162778	41.9425	0	0	5.4802	0	X233C241205T22	0	1.69232
0	0	0	0	29.7296	70.2625	0	0	0	0.0013202	0	0	0	0	X233C241205T23	1	-1.25097
0	0	0	1.48148	0	0	0	0	5.18519	0	4.22222	0.0740741	0	0	X233C241205T24	1	2.50263
0	0	0	0	65.8952	0	0	0	13.7576	0.064288	0	0	0.032144	0	X233C241205T25	1	1.24667
0	0	0.348432	32.833	0	0	0	0.151881	0	12.2755	8.56785	0.0178683	0	0	X233C241205T27	1	2.79881
0	0	0	0.0464557	97.9013	0	0	0	0	0	0.204952	0	0	0.0532874	X233C241205T28	0	1.12314
0	0	0	0.0244618	0.122309	0	0.342466	0.0244618	0	0.0244618	0.244618	1.22309	0	0	X233C241205T29	1	2.8315
0	0	0	0	99.0403	0.00279795	0.0979281	0	0	0.00139897	0	0.0139897	0	0	X233C241205T30	1	0.618785
0	0	0	3.01245	0	0	0.178269	0	0.00302151	35.394	3.43244	0.166183	1.49565	0	X233C241205T31	1	2.07756
0	0	0	0	0	0.0345901	0	0	0	90.4704	0	0	0.0518852	0	X233C241205T32	1	1.51507
0	0	0	0.824821	0	0	0	0	0	98.8807	0	0	0.0713234	0.0885791	X233C241205T33	0	0.984861
0	0	0	0	0	0	0	0	0.698603	0	0	0	0	0	X233C241205T34	0	2.42172
0	0	0	0	59.3784	0.109689	0	0	3.25411	0	5.4479	0	0	0	X233C241205T35	1	2.23551
0	0	0	0	0	0	0	0	17.6716	0.179104	0	0	0	0	X233C241205T36	1	2.59592
0	0	0.0265239	0.180845	33.8084	0	0.101273	0	0	61.5837	0.706501	0.0771605	0	0.118152	X233C241205T37	0	1.3155
0	0	0	0.32694	8.46992	0	1.1857	0.893636	0	7.38884	14.0671	0.985179	0.0741064	0.0348736	X233C241205T38	1	2.75158
0	0	0	0	95.8213	0	0	0	0.0221976	0.00554939	0	0	0	0	X233C241205T39	1	0.733695
0	0	0	0	2.7587	0	0	0	0	0.00140463	0.0210695	0.32447	0	0	X233C241205T40	1	2.55966
0	0	0	0	0	0	0	0	2.34824	85.9855	0.0499625	0	0	0	X233C241205T41	1	1.88898
0	0	0	0	94.5835	0	0	0	0	0	0	0	0	0	X233C241205T42	1	0.756241
0	0	0	0	3.23742	46.581	0.0151329	0	0	48.0095	0.206816	0	1.13698	0	X233C241205T43	0	0.568851
0	0	0	0	33.5883	0	0.472044	0	0	13.559	6.47839	0.349963	0	0	X233C241205T44	1	2.46331
0	0	0	0	10.2804	0	0	0	0.0311526	85.0779	0	0	0	0	X233C241212T01	1	0.365651
0	0	0	84.9946	0.107643	0	0	0.312164	0.0107643	0.0753498	0	0	0	0	X233C241212T03	0	2.95438
0	0	0	0	99.7227	0	0	0	0	0.00723956	0.00579165	0.00579165	0	0.0702237	X233C241212T04	1	0.436801
0	0	0	0	99.9975	0	0	0	0	0	0	0	0	0	X233C241212T05	1	-2.90227
0	0	0	0	0	0	18.5683	0.125385	0	0.0113986	6.77077	0.216574	0	0.227972	X233C241212T06	1	2.87644
0	0	0	0	99.8989	0	0	0	0	0	0	0	0	0	X233C241212T07	1	-1.32642
0	0	0	20.1127	0.0109427	0	4.37709	9.27942	0	0	8.87454	0.0711276	0	0	X233C241212T08	0	2.82672
0	0	0	0	99.5391	0	0	0.0927959	0	0.0015466	0.170126	0	0	0	X233C241212T09	1	-0.244185
0.00922116	0.0242055	0	0	0	0	0.0587849	0	0	0	0.632802	0	0	0.101433	X233C241212T10	0	2.85753
0	0.0178667	0	0	28.2651	0	0.410934	0	0.0178667	0.0178667	0.196534	0	0	0	X233C241212T11	0	2.42396
0	0	0	19.5806	0	0	1.13043	0	0	0	0.056266	2.58824	0	0	X233C241212T12	1	2.94674
0	0	0	0	99.099	0	0	0	0	0	0.746269	0	0	0	X233C241212T13	1	-0.346293
0	0	0	0.0923099	99.7586	0	0	0.110062	0	0	0.0142015	0	0	0	X233C241212T14	1	0.0186222
0	0	0	0.00412057	1.29592	0	0.0988936	0.0607784	0	96.207	0.190576	0.134949	0.286379	0.021633	X233C241212T15	1	1.12114
0	0	0	0.0221111	4.80522	1.34246	0	0	0	92.2966	0.112925	0	0	0	X233C241212T16	1	0.914653
0	0	0	0.737414	6.55293	3.59992	2.54073	0	0.00335188	76.1648	0	0.821211	1.10277	0	X233C241212T17	1	1.8359
0	0	0	0.240624	99.7594	0	0	0	0	0	0	0	0	0	X233C241212T18	1	0.402529
0	0	0	0	16.9593	0	0	2.69446	0.0121921	0	0.17069	0	0	0	X233C241212T19	1	2.90229
0	0	0	0.375473	98.8399	0	0	0.00747954	0	0.000747954	0.097982	0	0	0	X233C241212T20	0	0.994284
0	0	0	0	0.994442	0	0	0	0.00434254	98.9187	0	0	0	0	X233C241212T21	0	-0.885135
0	0	0	14.4824	0	0	0.00434073	0	0	76.31	0.0425392	0.0260444	5.69938	0	X233C241212T22	0	2.19237
0	0	0	8.48838	0.00814233	0	2.32463	0	0	31.2584	1.64475	0.305337	0	0	X233C241212T23	1	2.78927
0	0	0	0	99.8576	0	0	0	0	0	0	0	0	0.00890299	X233C241212T24	1	-0.430991
0	0	0	0	39.1045	33.1444	0	0	0	27.7337	0	0	0	0	X233C241212T25	1	-2.11748
0	0	0	0	0	3.39059	0	0	0	95.8604	0.0137321	0	0	0	X233C241212T26	0	-0.019142
0	0	0	82.272	0.012101	0	0	0	0.00907578	0	0	0	0	0	X233C241212T27	0	2.95214
0	0.00904159	0	0	1.85805	0	0.727848	0	0	21.736	15.2441	3.58951	0	0.022604	X233C241212T28	0	2.70822
0	0	0	0.67342	12.924	2.09602	0	0	0	82.9344	0.0392828	0	0	0	X233C241212T29	1	0.983875
0	0	0	0	0	0	0	0	0.0361925	75.0995	1.99059	0	0	0	X233C241212T30	1	2.15235
0	0	0	13.2178	3.56436	1.28713	0.0495049	6.23762	0	14.802	0	0.0990099	0.0990099	0	X233C241212T31	1	2.68927
0	0	0	0	96.7327	0	2.06965	0	0	0.00581362	0.947619	0.00581362	0	0	X233C241212T32	1	0.241568
0	0	0	0	0	1.65158	0.732481	0	0.0139965	68.1674	0.429225	0	0	0	X233C241212T33	1	2.37214
0	0	0	0	99.5955	0	0	0	0	0.0022105	0.214418	0	0	0.0567361	X233C241212T34	1	0.0555941
0	0	0	0	61.3925	0	0	2.13925	0.0605449	0	0	0	0.181635	0	X233C241212T35	1	2.47322
0	0	0	0	11.3472	0	0	0	0.00357168	85.3704	0.0107151	0	0.160726	0	X233C241212T36	1	1.23384
0	0	0	0	0	0	0	0	0	99.9033	0	0	0	0	X233C241212T37	1	-1.31575
0	0	0	0	0	0	0	0	0	99.2643	0.0902049	0.00993082	0	0	X233C241212T38	1	0.346343
0	0	0	5.42096	15.2315	0	2.59055	0	0.0479731	0	4.1017	0	0	0	X233C241230T24	1	2.39558
0	0	0	0	88.3935	0	0	0	0	10.9268	0.0218737	0	0.316328	0	X233C241230T25	1	-0.66681
0	0	0	0	50.198	49.439	0	0	0	0.0198699	0.173531	0	0	0	X233C241230T26	1	-0.334448
0	0	0	13.4808	0.0626043	0	0	0	0.0834725	0	0.0417362	0	0	0	X233C241230T27	0	2.33924
0	0	0	0.0217276	0.375404	0.210033	0	0.100188	0	98.0023	0.0639757	0	0.121916	0	X233C241230T28	1	0.866606
0	0	0	0.575448	17.711	0	0	0	0.319693	3.13299	0	0	0	0	X233C241230T29	1	1.82238
0	0	0	81.7143	0.574261	0	0.565194	0	0	0	0.190413	0	0	0.160189	X233C241230T30	1	2.98123
0	0	0	0.248933	88.0178	11.574	0	0	0	0.00133835	0	0	0	0.0428271	X233C241230T31	0	0.589042
0	0	0.778643	0	1.63144	1.94043	0	0	0.0247188	0.296626	4.43703	1.07527	0	0	X233C241230T32	0	2.91101
0	0	0.0359615	0.0449519	0.0179808	0	0.359615	0	0	71.5454	2.08577	1.72615	0	0.00899038	X233C241230T34	1	2.27375
0	0	0	0	99.8454	0	0	0	0	0.00220824	0.0419565	0.00883295	0	0	X233C241230T35	1	-0.783798
0	0	0	0	87.2669	0	0.182842	0	0.0219411	0	0.511958	0.0511958	0	0	X233C241230T36	1	1.11223
0.00274454	0	0	0	99.049	0	0	0	0	0	0.161928	0.0644967	0	0.0480294	X233C241230T37	1	0.60081
0	0	0	5.09094	80.6948	0.00962371	0	0	0	11.0192	0	0	0.317583	0	X233C250106T01	1	1.787
0	0	0	12.0182	0	0	0	0	0	0	0.0133025	0	0	0.0266051	X233C250106T11	0	2.99742
0	0	0	0.249437	7.71599	0.000872159	0	0	0	91.4441	0	0	0.149139	0	X233C250106T12	1	0.71657
0.0232967	0	0	0.000386133	99.704	0	0	0	0	0.0377123	0	0.00128711	0	0.208512	X233C250106T14	0	0.416855
0.0119868	0	0	0	0	0	0	0	5.83159	87.6835	0	0	0	0.227749	X233C250106T15	0	0.935282
0	0	0	86.6317	7.80244	0	0	0	0.0338868	0.0084717	0	0	0	0	X233C250106T17	0	2.96023
0	0	0	0	87.0439	0	0	0	0	0.0285796	0	0	0	0	X233C250106T19	1	0.82279
0	0	0	0	0.314005	0	0	0	0	99.1208	0	0	0.382039	0	X233C250106T34	1	-1.05077
0	0	0	0	0	0.0513875	0.308325	0	0.0513875	0.102775	0.668037	0	0	0	X233C250106T37	1	3.00952
0	0	0	11.5091	38.6941	0	0.0625251	0	0	21.6158	4.83676	1.47604	0	0	X233C250106T39	1	2.52431
0	0	0	0	0.892124	3.93602	0	0	0	94.3475	0	0	0.526651	0	X233C250106T41	0	-0.156725
0	0	0	0	19.4365	0	0.0159185	0	0	36.1668	4.31391	2.149	0	0	X233C250106T44	1	2.55629
